# Supplementary material
Source: HighWire-hosted journal article supplement (https://bmjopen.bmj.com/content/11/8/e045570)
Supplement: inline-supplementary-material-6 [file inline-supplementary-material-6.pdf]

**5. Which picture best describes how well connected, in general, you felt to the rest of the group today?**

For example, the first picture would suggest that you felt very little connection to the rest of the group, whereas the final picture would suggest that you felt very connected to the group.

**Please tick the box on the right hand side of the picture that best describes how you felt.**

individuals group

**6. How much did you identify with other members of this group? (please circle one)**

Not at all 1                      2                      3                      4                      Very much 5
