# Supplementary material
Source: HighWire-hosted journal article supplement (https://bmjopen.bmj.com/content/11/8/e045570)
Supplement: inline-supplementary-material-7 [file inline-supplementary-material-7.pdf]

**7. Did you miss any of the group sessions?** Yes / No

If yes, why?

**8. Overall, how much did you feel included and part of the group?**

Not at all 1                      2                      3                      4                      Very much 5

**9. How satisfied were you with the way the sessions were facilitated and delivered?**

Not satisfied at all 1                      2                      3                      4                      Very satisfied 5

**10. Did you discuss the programme with anyone who had access to the online materials only (i.e. they did not attend the group sessions)?** Yes / No**11. Did you discuss the programme with anyone who attended the group sessions?** Yes / No**12. Do you have any suggestions about how the programme or materials could be improved?****13. Would you recommend this programme to other parent carers?**

Not at all 1                      2                      3                      4                      Very much 5

**14. Do you have any other comments, reflections or suggestions?**
