# Supplementary material
Source: HighWire-hosted journal article supplement (https://bmjopen.bmj.com/content/11/8/e045570)
Supplement: inline-supplementary-material-8 [file inline-supplementary-material-8.pdf]

Appendix 2: Data collection materials

Follow-up questionnaire  
Version 1, 11 June 2019**HEALTHY PARENT CARERS  
Follow-up questionnaire****1. Have you continued to access the online resources in the past 6 months?**

Yes / No

**2. Approximately how many of the online materials have you accessed in total?**

| None | 25% | 50% | More than 50% |
|------|-----|-----|---------------|
|      |     |     |               |

**3. Did you attend group sessions for the programme?** Yes / No*If yes, reveal question 4.**If no, end survey.***4. Since the Healthy Parent Carers group ended, how many members of your group have you been in touch with (including members that you knew prior to starting)?****(number up to 10)****5. Out of these, how many were people that you did not know before the programme?****(number up to 10)****6. Since the group ended, have you been in touch with any members the group that you didn't know before in any of the following ways?**

(select all that apply)

Phone

Text

Email

WhatsApp

Other Social media (e.g. Facebook, Twitter)

Meeting in person

Other (please specify – please do not include anyone's name) (free text box needed if ticked)

## Appendix 2: Data collection materials

Follow-up questionnaire  
Version 1, 11 June 2019

I have not been in touch with any of the group members that I didn't know before

**7. Approximately how long ago was the last time you had contact with any members of the group that you didn't know before it started (please do not include anyone's name)?**

(free text)

**8. Can you please describe how often you have been in touch with any members of the group that you didn't know before (please do not include anyone's name)?**

(free text)

**9. How many of these new contacts would you now say are your friends?**

(number up to 10)
